# Supplementary material for: Chronic Lithium Treatment Alters NMDA and AMPA Receptor Synaptic Availability and Dendritic Spine Organization in the Rat Hippocampus
Source: PubMed Central journal article supplement (PMC11333793; doi:10.2174/1570159x21666230913144420), 2023-09-15
Supplement: CN-22-2045_SD1.pdf [file CN-22-2045_SD1.pdf]

### Supplementary Material

## Chronic Lithium Treatment Alters NMDA and AMPA Receptor Synaptic Availability and Dendritic Spine Organization in the Rat Hippocampus

Lucia Caffino<sup>1,#</sup>, Giorgia Targa<sup>1,#</sup>, Anne Stephanie Mallien<sup>2</sup>, Francesca Mottarlini<sup>1</sup>, Beatrice Rizzi<sup>1</sup>, Judith R. Homberg<sup>3</sup>, Peter Gass<sup>2,°</sup> and Fabio Fumagalli<sup>1,°,\*</sup>

<sup>1</sup>Department of Pharmacological and Biomolecular Sciences ‘Rodolfo Paoletti’, Università degli Studi di Milano, Via Balzaretti 9, 20133, Milan, Italy; <sup>2</sup>Department of Psychiatry and Psychotherapy, RG Animal Models in Psychiatry, Central Institute of Mental Health, Medical Faculty Mannheim, Heidelberg University, Mannheim, Germany; <sup>3</sup>Department of Cognitive Neuroscience, Division of Molecular Neurogenetics, Donders Institute for Brain, Cognition and Behaviour, Radboud University Nijmegen Medical Centre, The Netherlands

**Supplementary figure 1.** Cropped immunoblot related to the expression levels of GluN2A, GluN2B, GluN1, Neuroligin-1, GluA1, GluA2, PSD95, pCaMKII<sub>Thr286</sub>, CaMKII, β-actin measured in the **post-synaptic density** of the Hippocampus of rats sacrificed 24 h after the last injection of NaCl or LiCl, presented in figures 1, 3, 4.

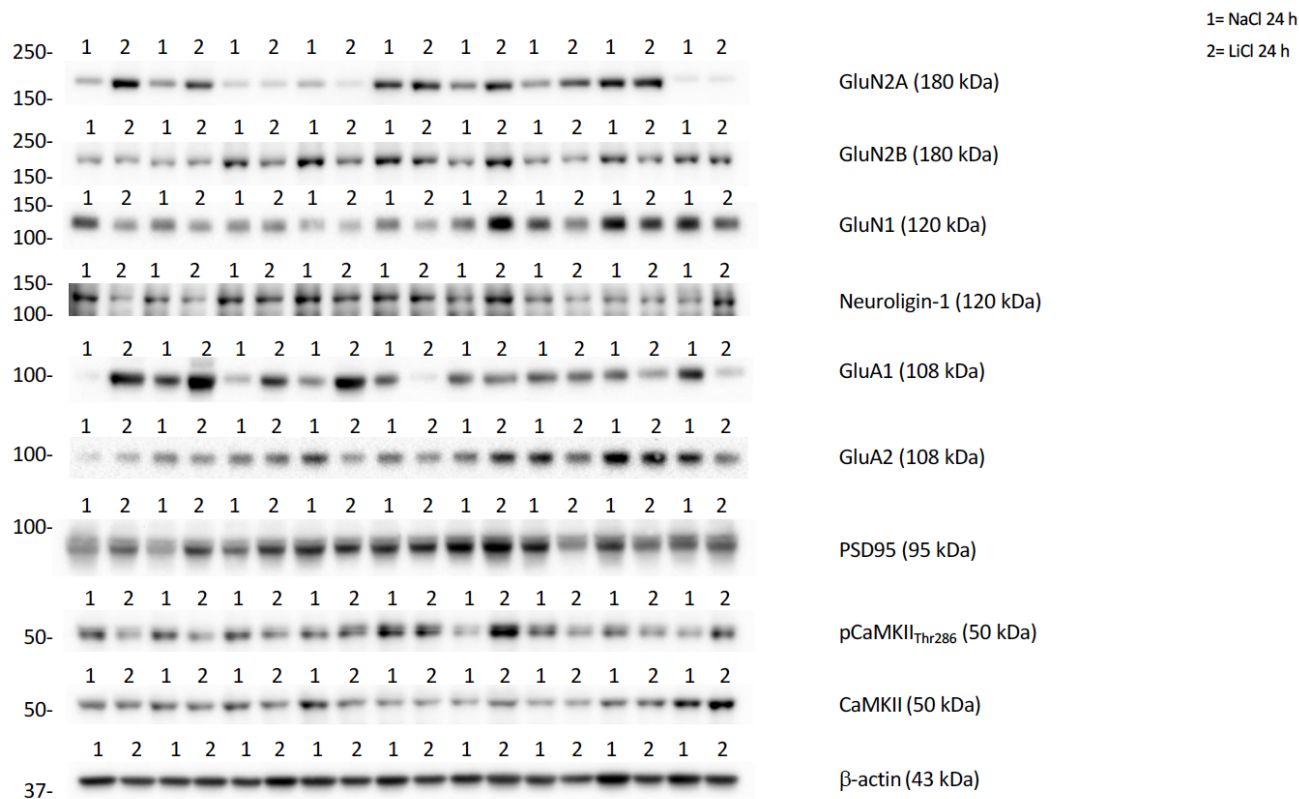

**Supplementary figure 2.** Cropped immunoblot related to the expression levels of GluN2A, GluN2B, GluN1, Neuroligin-1, GluA1, GluA2, PSD95, pCaMKII<sub>Thr286</sub>, CaMKII,  $\beta$ -actin measured in **the post-synaptic density** of the Hippocampus of rats sacrificed 24 hours and 7 days after the last injection of NaCl or LiCl, presented in figures 1, 3, 4.

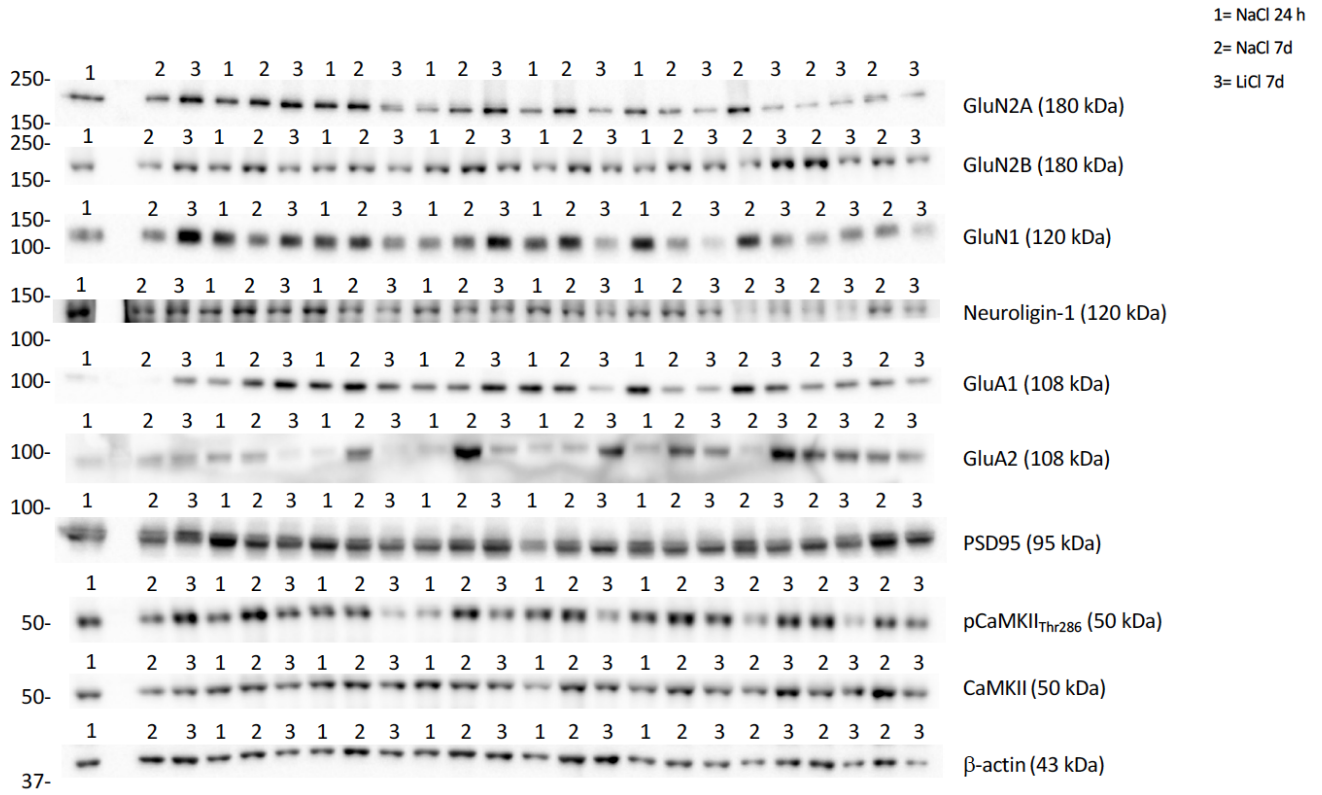

**Supplementary figure 3.** Cropped immunoblot related to the expression levels of GluA3 and  $\beta$ -actin measured in the **post-synaptic density** of the Hippocampus of rats sacrificed 24 hours (a) and 7 days (b) after the last injection of NaCl or LiCl, presented in figure 3.

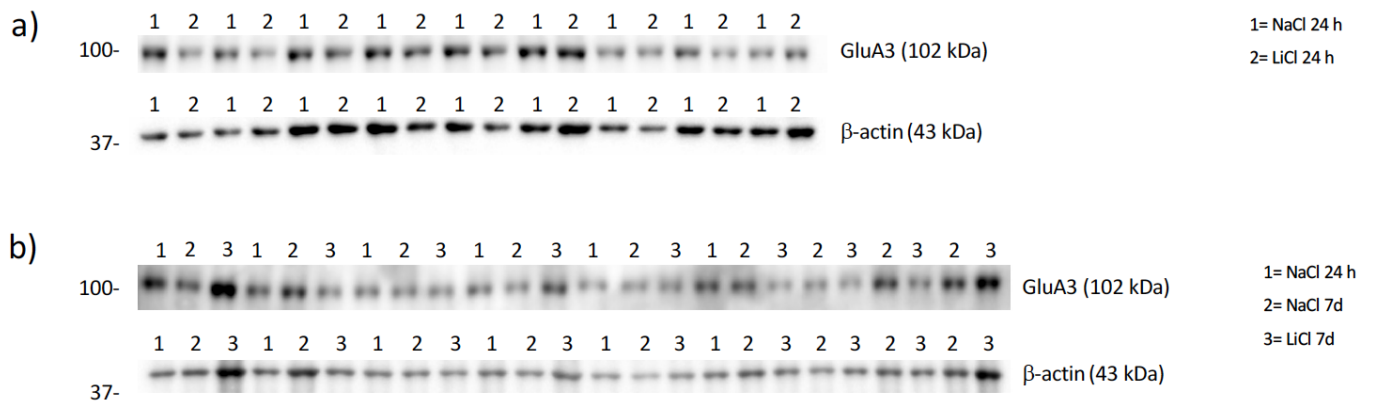

**Supplementary figure 4.** Cropped immunoblot related to the expression levels of GluN2B, mGluR5, GluN1, GluA1, GluA2, GluA3,  $\beta$ -actin measured in the **extra-synaptic fraction** of Hippocampus of rats sacrificed 24 h after the last injection of NaCl or LiCl, presented in figures 1, 3, 4.

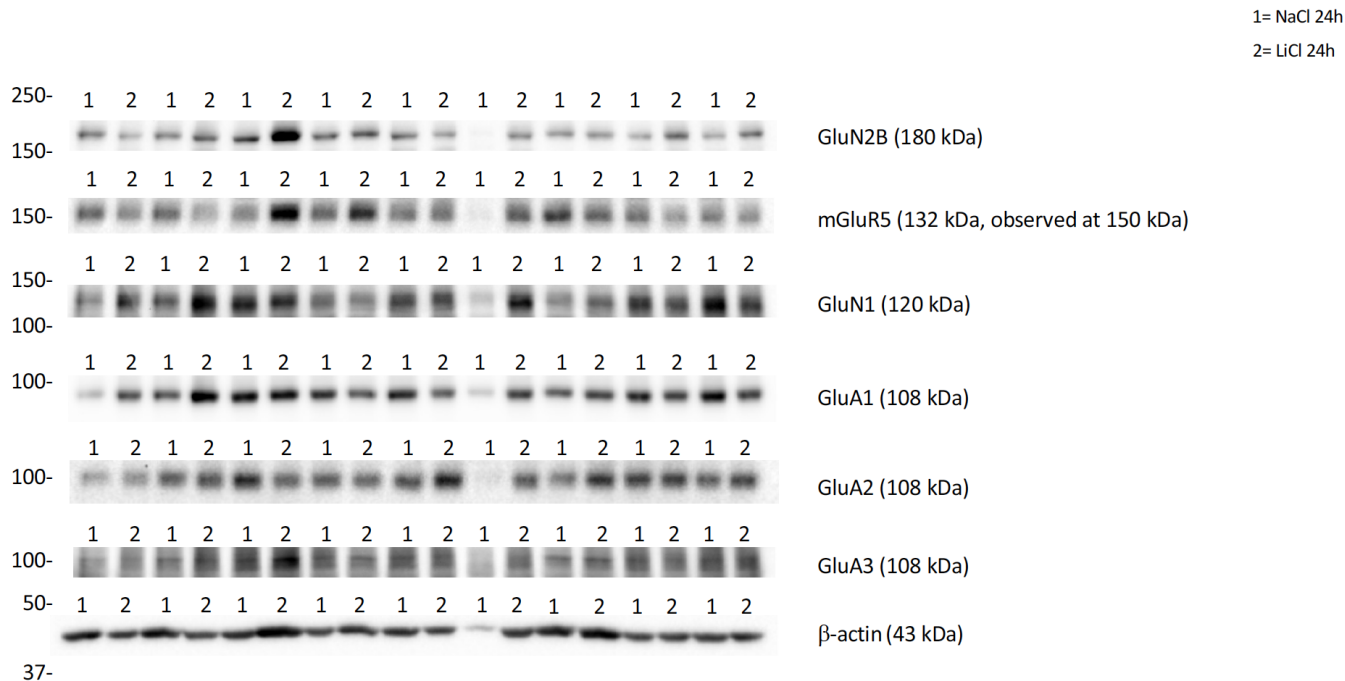

**Supplementary figure 5.** Cropped immunoblot related to the expression levels of GluN2B, mGluR5, GluN1, GluA1, GluA2, GluA3,  $\beta$ -actin measured in the **extra-synaptic fraction** of Hippocampus of rats sacrificed 24 and 7 days after the last injection of NaCl or LiCl, presented in figures 1, 3, 4

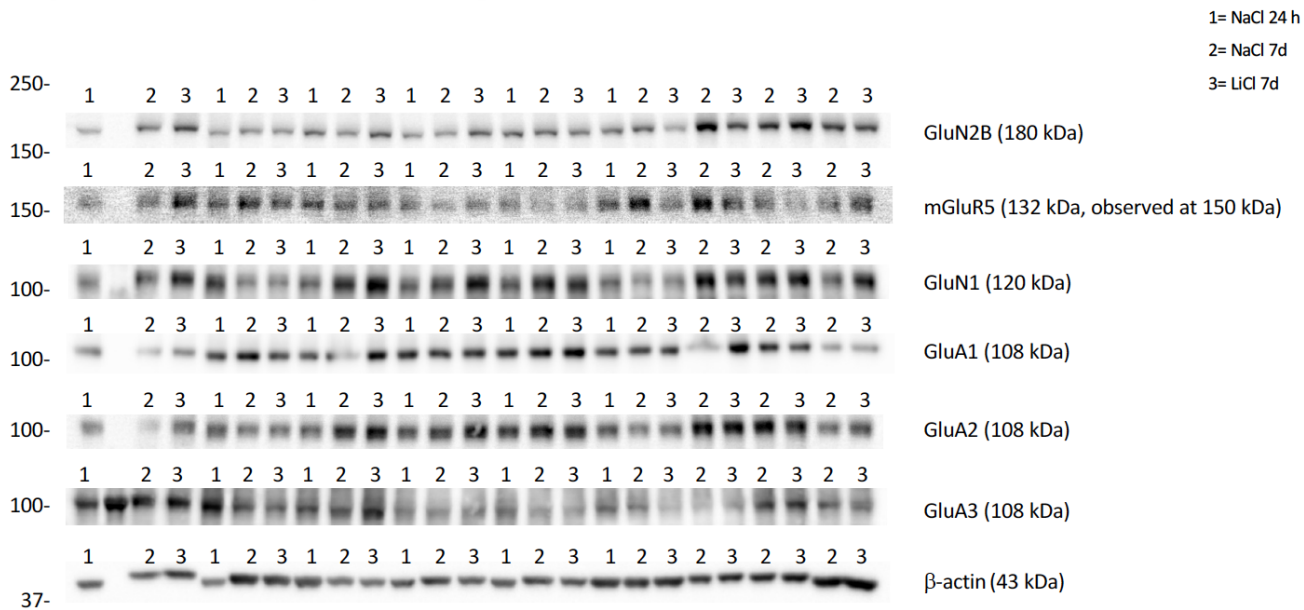



**Supplementary Table 1.** Effects of LiCl treatment on dendritic spine morphology in the hippocampus of rats sacrificed 24 hours or 7 days after the last exposure. Table (a) shows the percentage of thin-, stubby-shaped spines and filopodia, expressed as mean percentage  $\pm$  mean standard error. Table (b) shows the length and head width of thin- and stubby-shaped spines, expressed as  $\mu\text{m} \pm$  mean standard error.

a)

|                                   | % Thin           |                  | % Stubby         |                  | % filopodia     |                 |
|-----------------------------------|------------------|------------------|------------------|------------------|-----------------|-----------------|
|                                   | NaCl             | LiCl             | NaCl             | LiCl             | NaCl            | LiCl            |
| 24 hours after the last treatment | 13,63 $\pm$ 3,71 | 13,70 $\pm$ 4,03 | 21,03 $\pm$ 2,80 | 21,09 $\pm$ 2,22 | 6,14 $\pm$ 2,68 | 4,82 $\pm$ 2,09 |
| 7 days after the last treatment   | 7,45 $\pm$ 1,98  | 12,22 $\pm$ 3,50 | 22,31 $\pm$ 1,94 | 21,72 $\pm$ 1,24 | 6,22 $\pm$ 1,84 | 4,74 $\pm$ 2,06 |

b)

|                                   | Thin ( $\mu\text{m}$ ) |                 |                 |                 | Stubby ( $\mu\text{m}$ ) |                 |                 |                 |
|-----------------------------------|------------------------|-----------------|-----------------|-----------------|--------------------------|-----------------|-----------------|-----------------|
|                                   | NaCl                   |                 | LiCl            |                 | NaCl                     |                 | LiCl            |                 |
|                                   | Spine length           | Head width      | Spine length    | Head width      | Spine length             | Head width      | Spine length    | Head width      |
| 24 hours after the last treatment | 1,27 $\pm$ 0,04        | 0,51 $\pm$ 0,05 | 1,19 $\pm$ 0,07 | 0,43 $\pm$ 0,02 | 0,80 $\pm$ 0,01          | 0,41 $\pm$ 0,02 | 0,79 $\pm$ 0,01 | 0,37 $\pm$ 0,02 |
| 7 days after the last treatment   | 1,25 $\pm$ 0,02        | 0,57 $\pm$ 0,09 | 1,27 $\pm$ 0,05 | 0,53 $\pm$ 0,03 | 0,76 $\pm$ 0,01          | 0,36 $\pm$ 0,01 | 0,78 $\pm$ 0,01 | 0,37 $\pm$ 0,01 |
